# Supplementary material for: Role of matrix metalloproteinase-9 in neurodevelopmental deficits and experience-dependent plasticity in Xenopus laevis
Source: eLife. 2021 Jul 20;10:e62147. doi: 10.7554/eLife.62147 (PMC8315794; doi:10.7554/eLife.62147)
Supplement: Figure 1—source data 1. [file elife-62147-fig1-data1.xlsx]

## Sheet: Figure1
Figure 1. B and C								Figure 1. D
Group	sEPSC Frequency	sEPSC Amplitude		Group	sIPSC Frequency	sIPSC Amplitude		Group	Number of barrages
MMP9 transfected	18.5333	6.48037		MMP9 transfected	12.0833	6.08962		MMP9 transfected	0
MMP9 transfected	2.45	4.85001		MMP9 transfected	6.95	5.56957		MMP9 transfected	0
MMP9 transfected	7.48333	4.69563		MMP9 transfected	7.41667	10.16		MMP9 transfected	0
MMP9 transfected	1.41667	5.1923		MMP9 transfected	9.23333	5.48578		MMP9 transfected	0
MMP9 transfected	1.28333	5.4177		MMP9 transfected	7.76667	3.9161		MMP9 transfected	0
MMP9 transfected	10.3333	7.10461		MMP9 transfected	11.1167	7.95106		MMP9 transfected	3
MMP9 transfected	10.5333	6.53072		MMP9 transfected	1.55	7.33098		MMP9 transfected	3
MMP9 transfected	19.6	8.20632		MMP9 transfected	9.63333	6.17614		MMP9 transfected	4
MMP9 transfected	4.51667	4.69932		MMP9 transfected	8.31667	5.02454		MMP9 transfected	0
MMP9 transfected	3.01667	5.56394		MMP9 transfected	9.08333	4.89593		MMP9 transfected	0
MMP9 transfected	8.61667	5.43031		MMP9 transfected	9.4	4.61667		MMP9 transfected	1
MMP9 transfected	0.166667	5.34973		MMP9 transfected	5.66667	5.65203		MMP9 transfected	0
MMP9 transfected	7.01667	7.51833		MMP9 transfected	6.93333	4.97814		MMP9 transfected	3
MMP9 transfected	3.25	8.35352		MMP9 Non-transfected	3.85	6.16799		MMP9 transfected	1
MMP9 transfected	2.93333	7.3006		MMP9 Non-transfected	5.63333	4.78331		MMP9 transfected	2
MMP9 Non-transfected	6.25	15.172		MMP9 Non-transfected	3.83333	5.83602		MMP9 Non-transfected	0
MMP9 Non-transfected	0.533333	4.96483		MMP9 Non-transfected	6.63333	3.45033		MMP9 Non-transfected	1
MMP9 Non-transfected	0.533333	4.99535		MMP9 Non-transfected	9.01667	5.32405		MMP9 Non-transfected	2
MMP9 Non-transfected	1.65	4.70834		MMP9 Non-transfected	6.21667	9.62801		MMP9 Non-transfected	0
MMP9 Non-transfected	2.06667	6.01787		MMP9 Non-transfected	8.31667	5.41723		MMP9 Non-transfected	2
MMP9 Non-transfected	0.566667	4.47388		MMP9 Non-transfected	9.06667	4.64924		MMP9 Non-transfected	0
MMP9 Non-transfected	3.9	4.80534		MMP9 Non-transfected	7.81667	4.36982		MMP9 Non-transfected	0
MMP9 Non-transfected	4.26667	7.19738		MMP9 Non-transfected	2.96667	2.71226		MMP9 Non-transfected	4
MMP9 Non-transfected	7.96667	5.2799		MMP9 Non-transfected	6.93333	3.27768		MMP9 Non-transfected	2
MMP9 Non-transfected	1.88333	6.10449		MMP9 Non-transfected	5.65	3.88473		MMP9 Non-transfected	0
MMP9 Non-transfected	2.51667	5.00969		MMP9 Non-transfected	8.11667	5.34687		MMP9 Non-transfected	0
MMP9 Non-transfected	0.75	5.79169		MMP9 Non-transfected	3.8	3.55219		MMP9 Non-transfected	0
MMP9 Non-transfected	1.08333	6.61198		MMP9 Non-transfected	7.31667	5.61067		MMP9 Non-transfected	0
MMP9 Non-transfected	0.616667	5.09693		GFP control	6.93333	3.92168		MMP9 Non-transfected	0
MMP9 Non-transfected	1.45	5.07644		GFP control	0.9	7.32535		MMP9 Non-transfected	0
MMP9 Non-transfected	7.1	7.71408		GFP control	1.63333	4.4101		MMP9 Non-transfected	5
MMP9 Non-transfected	9.15	7.19548		GFP control	5.61667	3.51432		MMP9 Non-transfected	5
MMP9 Non-transfected	1.7	6.75145		GFP control	4.85	5.61572		MMP9 Non-transfected	0
MMP9 Non-transfected	1.58333	10.807		GFP control	5.33333	4.29949		MMP9 Non-transfected	0
GFP control	0.533333	3.7365		GFP control	6.71667	5.58564		GFP control	0
GFP control	1.46667	3.63853		GFP control	6.9	5.30636		GFP control	0
GFP control	0.616667	5.27212		GFP control	0.0666667	5.5191		GFP control	0
GFP control	0.183333	4.7108		GFP control	7.85	5.96247		GFP control	0
GFP control	3.26667	3.58186		GFP control	10.6333	5.98757		GFP control	1
GFP control	0.5	6.84469						GFP control	0
GFP control	0.716667	4.56358						GFP control	0
GFP control	1.68333	5.85351						GFP control	0
GFP control	4.21667	8.72793						GFP control	0
GFP control	1.7	8.61056						GFP control	0
GFP control	0.2	5.24038
