# Supplementary material for: Role of matrix metalloproteinase-9 in neurodevelopmental deficits and experience-dependent plasticity in Xenopus laevis
Source: eLife. 2021 Jul 20;10:e62147. doi: 10.7554/eLife.62147 (PMC8315794; doi:10.7554/eLife.62147)
Supplement: Figure 2—figure supplement 1—source data 1. [file elife-62147-fig2-figsupp1-data1.xlsx]

## Sheet: Figure 2-Figure supplement 1
Figure 2- Figure supplement 1. A
Group	Synapse density (puncta/micron)
Control	0.0904687
Control	0.116021
Control	0.205567
Control	0.126212
Control	0.0752525
Control	0.156286
Control	0.109382
Control	0.133331
Control	0.0759858
Control	0.0624033
Control	0.14469
Control	0.0617165
Control	0.0459996
Control	0.212282
Control	0.141649
Control	0.121182
Control	0.171568
Control	0.125292
Control	0.179751
Control	0.128193
Control	0.0559062
VPA	0.198899
VPA	0.264106
VPA	0.115615
VPA	0.153989
VPA	0.223119
VPA	0.125978
VPA	0.173501
VPA	0.150868
VPA	0.247115
VPA	0.140833
VPA	0.0991326
VPA	0.149056
VPA	0.260864
VPA	0.257349
VPA	0.259544
VPA	0.355879
VPA	0.265091
VPA	0.197654
VPA	0.285167
