# Supplementary material for: Role of matrix metalloproteinase-9 in neurodevelopmental deficits and experience-dependent plasticity in Xenopus laevis
Source: eLife. 2021 Jul 20;10:e62147. doi: 10.7554/eLife.62147 (PMC8315794; doi:10.7554/eLife.62147)
Supplement: Figure 2—source data 1. [file elife-62147-fig2-data1.xlsx]

## Sheet: Figure2
Figure 2. B and C				Figure 2. D			Figure 2. E
Group	sEPSC Frequency	sEPSC Amplitude		Group	Evoked response (Charge pA/ms)		Group	Number of barrages
Control	6.10526	6.3		Control	3326		Control	2
Control	0.844828	3.45039		Control	1036.44		Control	1
Control	1.68333	5.23624		Control	3708.85		Control	0
Control	4.98148	4.59		Control	2069.33		Control	2
Control	5.0678	5.95477		Control	81.4606		Control	1
Control	5.11864	6.4		Control	2635.04		Control	1
Control	2.31667	4.94474		Control	381.235		Control	0
Control	2.23333	3.61058		Control	46.5407		Control	0
Control	1.66667	8.45607		VPA	2059.27		Control	0
Control	1.48333	4.80126		VPA	3560.18		Control	0
Control	2.06667	5.09203		VPA	7797.59		Control	0
Control	2.11667	6.64691		VPA	2152.75		Control	0
Control	2.51667	4.17138		VPA	2087.51		Control	0
Control	5.66667	4.167		VPA	8944.49		Control	0
VPA	4.15789	9.94314		VPA	5628.93		VPA	3
VPA	1.34483	4.30667		VPA	1585.89		VPA	2
VPA	6.25	5.43971		VPA	2158.15		VPA	0
VPA	5.16667	5.03086		VPA	5283.74		VPA	4
VPA	13.2586	7.48957		VPA	4846.49		VPA	2
VPA	1.18333	3.01637		VPA	6364.77		VPA	0
VPA	9.23729	5.35492		VPA	2392.72		VPA	1
VPA	4.33333	6.94291		VPA	5035.91		VPA	0
VPA	5.38333	5.03546		VPA	1699.49		VPA	0
VPA	1.96491	4.67159		VPA	5017.03		VPA	3
VPA	8.4	4.82551		VPA + SB-3CT	667.763		VPA	0
VPA	2.96667	5.22902		VPA + SB-3CT	3185.7		VPA	0
VPA	8.05	4.83068		VPA + SB-3CT	987.23		VPA	0
VPA	7.88136	6.37375		VPA + SB-3CT	2591.3		VPA	1
VPA	13.5667	4.91313		VPA + SB-3CT	1472.47		VPA	0
VPA	6.58333	6.07035		SB-3CT	1598.14		VPA	0
VPA	5.01667	4.77353		SB-3CT	86.4188		VPA	0
VPA	18.9655	8.6756		SB-3CT	217.129		VPA	2
VPA	5.875	6.31163		SB-3CT	886.09		VPA	4
VPA	1.4386	5.53567		SB-3CT	2222.36		VPA	3
VPA	11.2667	7.55735		SB-3CT	2215.89		VPA	0
VPA + SB-3CT	4.9375	6.59816		SB-3CT	837.359		VPA + SB-3CT	1
VPA + SB-3CT	3.53333	5.75		SB-3CT	3560.22		VPA + SB-3CT	0
VPA + SB-3CT	8.35	5.86		SB-3CT	5141.89		VPA + SB-3CT	0
VPA + SB-3CT	5.36364	7.44		SB-3CT	1517.86		VPA + SB-3CT	2
VPA + SB-3CT	7.35714	7.11		SB-3CT	9761.23		VPA + SB-3CT	0
VPA + SB-3CT	9.64286	6.57		SB-3CT	3778.3		VPA + SB-3CT	0
VPA + SB-3CT	7.56667	6.44		SB-3CT	2694.06		VPA + SB-3CT	0
VPA + SB-3CT	4.21667	6.59					VPA + SB-3CT	0
VPA + SB-3CT	5.30189	5.39					VPA + SB-3CT	2
VPA + SB-3CT	0.966102	5.64					VPA + SB-3CT	1
VPA + SB-3CT	9.35088	4.68					VPA + SB-3CT	2
VPA + SB-3CT	7.46667	6.93					VPA + SB-3CT	0
VPA + SB-3CT	0.280702	5.69					VPA + SB-3CT	3
VPA + SB-3CT	0.711864	3.93					VPA + SB-3CT	0
VPA + SB-3CT	1.43103	6.59					VPA + SB-3CT	0
VPA + SB-3CT	8.14583	6.96					VPA + SB-3CT	0
VPA + SB-3CT	2	3.99					VPA + SB-3CT	2
VPA + SB-3CT	0.966667	4.09					VPA + SB-3CT	0
VPA + SB-3CT	2.16949	6.38					VPA + SB-3CT	0
VPA + SB-3CT	1.5	6.63					VPA + SB-3CT	0
VPA + SB-3CT	1.16667	6.45					VPA + SB-3CT	0
VPA + SB-3CT	2.26667	5.05					VPA + SB-3CT	0
SB-3CT	1.3	3.69278					SB-3CT	0
SB-3CT	5.15	5.24603					SB-3CT	0
SB-3CT	5.08	5.3213					SB-3CT	0
SB-3CT	12.77	6.02137					SB-3CT	0
SB-3CT	1.62	5.16533					SB-3CT	0
SB-3CT	1.05	3.68724					SB-3CT	0
SB-3CT	11	7.84137					SB-3CT	1
SB-3CT	1.67	4.01295					SB-3CT	0
SB-3CT	4.03448	6.60834					SB-3CT	1
SB-3CT	2.38983	5.18046					SB-3CT	1
SB-3CT	3	3.46326					SB-3CT	1
