# Supplementary material for: Role of matrix metalloproteinase-9 in neurodevelopmental deficits and experience-dependent plasticity in Xenopus laevis
Source: eLife. 2021 Jul 20;10:e62147. doi: 10.7554/eLife.62147 (PMC8315794; doi:10.7554/eLife.62147)
Supplement: Figure 3—source data 1. [file elife-62147-fig3-data1.xlsx]

## Sheet: Figure3
Figure 3. A		Figure 3. B and C							Figure 3. D
Relative expression level over control (MMP9 MO/Control MO)		Group	sEPSC Frequency	sEPSC Amplitude		Group	Evoked response (Charge pA/ms)		Group	Barrages
0.62		Control MO	2.75	5.15674		Control MO	285.014		Control MO	2
0.89		Control MO	13.7069	5.07538		Control MO	289.557		Control MO	1
0.72		Control MO	3	10.8867		Control MO	627.68		Control MO	0
0.75		Control MO	7.96552	5.87959		Control MO	5486.08		Control MO	2
0.64		Control MO	4.34483	5.65834		Control MO	3631.44		Control MO	1
		Control MO	9.12281	5.06945		Control MO	8220.97		Control MO	2
		Control MO	3.16949	5.24564		Control MO	1908.07		Control MO	0
		Control MO	1.61667	5.22209		Control MO	2966.83		Control MO	0
		Control MO	1.26667	6.02845		MMP9 MO	629.982		Control MO	0
		Control MO	9.56897	7.72755		MMP9 MO	355.193		Control MO	1
		Control MO	10.5185	7.03908		MMP9 MO	1210.07		Control MO	3
		MMP9 MO	3.83333	7.26463		MMP9 MO	1285.69		MMP9 MO	0
		MMP9 MO	2.88333	5.56745		MMP9 MO	2909.26		MMP9 MO	0
		MMP9 MO	7.46667	4.15463		MMP9 MO	3688.73		MMP9 MO	0
		MMP9 MO	0.683333	9.13995		MMP9 MO	3622.36		MMP9 MO	0
		MMP9 MO	0.4	4.73139		MMP9 MO	2831.03		MMP9 MO	0
		MMP9 MO	7.18333	4.97284		MMP9 MO	4130.12		MMP9 MO	0
		MMP9 MO	0.758621	4.07332		VPA + Control MO	12590		MMP9 MO	2
		MMP9 MO	1.8	12.0248		VPA + Control MO	15728		MMP9 MO	0
		MMP9 MO	2.2931	3.53544		VPA + Control MO	8739		MMP9 MO	2
		MMP9 MO	12.5	5.67116		VPA + Control MO	11709		MMP9 MO	2
		MMP9 MO	6.28333	5.05746		VPA + Control MO	7914		MMP9 MO	0
		MMP9 MO	8.54386	10.4161		VPA + Control MO	21104		MMP9 MO	3
		MMP9 MO	1.05	4.4284		VPA + Control MO	10434		MMP9 MO	0
		MMP9 MO	16.9821	5.36755		VPA + Control MO	13557		MMP9 MO	4
		MMP9 MO	13.2105	6.24487		VPA + Control MO	31353		MMP9 MO	3
		MMP9 MO	11.7931	8.35374		VPA + MMP9 MO	1438		MMP9 MO	2
		MMP9 MO	17.3	10.2691		VPA + MMP9 MO	2918		MMP9 MO	2
		MMP9 MO	3.10714	9.99436		VPA + MMP9 MO	3119		MMP9 MO	2
		VPA + Control MO	6.5	5.5		VPA + MMP9 MO	2002		VPA + Control MO	0
		VPA + Control MO	6.30189	4.7		VPA + MMP9 MO	3975		VPA + Control MO	3
		VPA + Control MO	4.23333	7.8		VPA + MMP9 MO	4304		VPA + Control MO	3
		VPA + Control MO	10.25	7.9		VPA + MMP9 MO	4928		VPA + Control MO	2
		VPA + Control MO	9.07407	9.4		VPA + MMP9 MO	1804		VPA + Control MO	4
		VPA + Control MO	4.09167	7.1		VPA + MMP9 MO	2017		VPA + Control MO	0
		VPA + Control MO	3.65	8.2		VPA + MMP9 MO	1024		VPA + Control MO	1
		VPA + Control MO	3.75	5.9					VPA + Control MO	4
		VPA + Control MO	6.06667	4.3					VPA + Control MO	0
		VPA + MMP9 MO	1.44444	7.6					VPA + MMP9 MO	2
		VPA + MMP9 MO	1.87273	6.9					VPA + MMP9 MO	0
		VPA + MMP9 MO	0.444444	4					VPA + MMP9 MO	2
		VPA + MMP9 MO	1.7	7.7					VPA + MMP9 MO	0
		VPA + MMP9 MO	1.41228	6					VPA + MMP9 MO	1
		VPA + MMP9 MO	2.19828	7.17					VPA + MMP9 MO	2
		VPA + MMP9 MO	3.66667	8.2					VPA + MMP9 MO	0
		VPA + MMP9 MO	0.985294	7.5					VPA + MMP9 MO	0
		VPA + MMP9 MO	0.744681	4.6					VPA + MMP9 MO	0
		VPA + MMP9 MO	1.03333	3.9					VPA + MMP9 MO	0
