# Supplementary material for: Role of matrix metalloproteinase-9 in neurodevelopmental deficits and experience-dependent plasticity in Xenopus laevis
Source: eLife. 2021 Jul 20;10:e62147. doi: 10.7554/eLife.62147 (PMC8315794; doi:10.7554/eLife.62147)
Supplement: Figure 4—source data 1. [file elife-62147-fig4-data1.xlsx]

## Sheet: Figure 4
Figure 4. A			Figure 4. B
Group	Seizure Frequency		Group	Tadpole ID	Bouts	Startle (cm/s)
Control	0.455945		VPA	1	1	24.8493
Control	0.874593		VPA	2	1	25.3473
Control	0.711496		VPA	3	1	27.5097
Control	0.469262		VPA	4	1	22.898
Control	0.439919		VPA	5	1	23.3873
Control	0.814459		VPA	6	1	20.0817
Control	0.369271		VPA	7	1	21.338
Control	0.800871		VPA	8	1	21.221
Control	0.218139		VPA	9	1	18.684
Control	0.322222		VPA	10	1	16.4467
Control	1.10085		VPA	11	1	16.7733
Control	0.1		VPA	12	1	15.617
Control	0.894096		VPA	13	1	14.5827
Control	0.672094		VPA	14	1	15.363
Control	0.929241		VPA	15	1	15.296
Control	0.552271		VPA	16	1	12.368
Control	0.707546		VPA	17	1	12.7303
Control	0.693429		VPA	18	1	15.325
Control	0.853101		VPA	19	1	12.7503
Control	0.942124		VPA	20	1	11.9627
Control	0.500614		VPA	21	1	13.019
Control	0.573117		VPA	22	1	13.9127
Control	0.846754		VPA	23	1	11.7393
Control	1.02666		VPA	24	1	12.9823
Control	0.863983		VPA	1	2	22.901
Control	0.977966		VPA	2	2	22.7857
Control	1.10664		VPA	3	2	19.6293
Control	0.166693		VPA	4	2	18.625
Control	1.01908		VPA	5	2	18.896
Control	1.26082		VPA	6	2	18.6413
Control	0.95		VPA	7	2	18.7433
Control	0.3		VPA	8	2	18.4283
Control	0.45		VPA	9	2	15.8643
Control	0.833803		VPA	10	2	15.1263
Control	0.600537		VPA	11	2	14.6077
Control	0.587802		VPA	12	2	16.6003
Control	0.3		VPA	13	2	15.143
Control	0.622853		VPA	14	2	15.363
Control	0.768773		VPA	15	2	13.6343
Control	0.963542		VPA	16	2	15.241
Control	0.876908		VPA	17	2	14.7363
Control	1.17002		VPA	18	2	15.5713
Control	1.05302		VPA	19	2	13.6853
Control	0.413239		VPA	20	2	13.748
Control	0.652269		VPA	21	2	15.209
Control	1.0384		VPA	22	2	13.123
Control	0.748664		VPA	23	2	14.8477
Control	1.26503		VPA	24	2	13.2987
VPA	1.40738		VPA	1	3	23.29
VPA	0.995669		VPA	2	3	20.298
VPA	1.20807		VPA	3	3	17.9027
VPA	0.932229		VPA	4	3	20.414
VPA	0.856734		VPA	5	3	16.6053
VPA	1.19631		VPA	6	3	18.3057
VPA	0.969894		VPA	7	3	16.7723
VPA	0.981942		VPA	8	3	18.4217
VPA	0.920789		VPA	9	3	17.1107
VPA	0.75		VPA	10	3	16.1037
VPA	1.07984		VPA	11	3	15.9263
VPA	1.00315		VPA	12	3	17.1147
VPA	0.75457		VPA	13	3	18.624
VPA	0.287675		VPA	14	3	16.2773
VPA	0.492249		VPA	15	3	18.3623
VPA	0.738336		VPA	16	3	17.2513
VPA	1.02071		VPA	17	3	16.3517
VPA	0.582644		VPA	18	3	16.505
VPA	0.668131		VPA	19	3	17.092
VPA	0.678794		VPA	20	3	14.9887
VPA	1.49759		VPA	21	3	15.6737
VPA	1.2816		VPA	22	3	14.7343
VPA	1.6129		VPA	23	3	15.995
VPA	1.06799		VPA	24	3	15.5527
VPA	1.19129		VPA	1	4	22.8217
VPA	0.97143		VPA	2	4	19.8363
VPA	1.25681		VPA	3	4	20.0807
VPA	0.635537		VPA	4	4	20.4177
VPA	0.955527		VPA	5	4	18.1533
VPA	1.10061		VPA	6	4	19.8457
VPA	0.454581		VPA	7	4	17.5617
VPA	0.638396		VPA	8	4	15.421
VPA	0.759139		VPA	9	4	15.61
VPA	0.709561		VPA	10	4	15.9817
VPA	0.342769		VPA	11	4	14.638
VPA	1.25664		VPA	12	4	16.3657
VPA	0.786133		VPA	13	4	16.7457
VPA	0.623896		VPA	14	4	17.186
VPA	1.3334		VPA	15	4	17.119
VPA	0.6		VPA	16	4	16.1663
VPA	0.8		VPA	17	4	15.2287
VPA	1		VPA	18	4	16.4617
VPA	0.706386		VPA	19	4	14.9397
VPA	0.899105		VPA	20	4	15.2073
VPA	0.91838		VPA	21	4	16.2573
VPA + SB-3CT	0.822533		VPA	22	4	17.3393
VPA + SB-3CT	0.533939		VPA	23	4	17.1963
VPA + SB-3CT	1.31845		VPA	24	4	14.548
VPA + SB-3CT	0.662132		VPA	1	5	20.45
VPA + SB-3CT	1.07155		VPA	2	5	17.937
VPA + SB-3CT	1.34674		VPA	3	5	19.7643
VPA + SB-3CT	0.486675		VPA	4	5	17.5837
VPA + SB-3CT	1.05052		VPA	5	5	19.0767
VPA + SB-3CT	1.13857		VPA	6	5	18.3217
VPA + SB-3CT	1.12513		VPA	7	5	17.4687
VPA + SB-3CT	0.996252		VPA	8	5	19.267
VPA + SB-3CT	0.55		VPA	9	5	16.55
VPA + SB-3CT	0.96409		VPA	10	5	16.4457
VPA + SB-3CT	0.631146		VPA	11	5	17.864
VPA + SB-3CT	0.642832		VPA	12	5	15.8843
VPA + SB-3CT	0.974576		VPA	13	5	17.001
VPA + SB-3CT	0.65117		VPA	14	5	17.943
VPA + SB-3CT	0.624718		VPA	15	5	17.2523
VPA + SB-3CT	0.710473		VPA	16	5	13.885
VPA + SB-3CT	1.0935		VPA	17	5	16.1817
VPA + SB-3CT	0.165128		VPA	18	5	14.4903
VPA + SB-3CT	0.538694		VPA	19	5	14.5657
VPA + SB-3CT	1.2228		VPA	20	5	16.89
VPA + SB-3CT	1.24137		VPA	21	5	16.983
VPA + SB-3CT	0.8		VPA	22	5	14.7893
VPA + SB-3CT	0.35		VPA	23	5	17.2523
VPA + SB-3CT	0.75		VPA	24	5	16.5567
VPA + SB-3CT	0.8		VPA	1	6	24.642
VPA + SB-3CT	0.996949		VPA	2	6	21.051
VPA + SB-3CT	0.471955		VPA	3	6	18.8867
VPA + SB-3CT	0.224508		VPA	4	6	18.395
VPA + SB-3CT	1.28508		VPA	5	6	17.8133
VPA + SB-3CT	0.449313		VPA	6	6	16.545
VPA + SB-3CT	0.665829		VPA	7	6	16.694
			VPA	8	6	15.5993
			VPA	9	6	15.9907
			VPA	10	6	17.0603
			VPA	11	6	19.6863
			VPA	12	6	18.6707
			VPA	13	6	19.8073
			VPA	14	6	18.379
			VPA	15	6	16.4723
			VPA	16	6	18.1417
			VPA	17	6	16.4097
			VPA	18	6	15.6247
			VPA	19	6	16.3247
			VPA	20	6	16.0797
			VPA	21	6	16.1433
			VPA	22	6	18.3957
			VPA	23	6	15.0803
			VPA	24	6	15.5097
			VPA + SB-3CT	1	1	24.8633
			VPA + SB-3CT	2	1	24.9957
			VPA + SB-3CT	3	1	25.0157
			VPA + SB-3CT	4	1	24.2487
			VPA + SB-3CT	5	1	23.2333
			VPA + SB-3CT	6	1	22.944
			VPA + SB-3CT	7	1	20.8707
			VPA + SB-3CT	8	1	20.103
			VPA + SB-3CT	9	1	17.193
			VPA + SB-3CT	10	1	14.1193
			VPA + SB-3CT	11	1	17.6793
			VPA + SB-3CT	12	1	16.36
			VPA + SB-3CT	13	1	18.4337
			VPA + SB-3CT	14	1	13.5953
			VPA + SB-3CT	15	1	11.841
			VPA + SB-3CT	16	1	12.868
			VPA + SB-3CT	17	1	13.205
			VPA + SB-3CT	18	1	12.8987
			VPA + SB-3CT	19	1	11.411
			VPA + SB-3CT	20	1	10.7473
			VPA + SB-3CT	21	1	11.9983
			VPA + SB-3CT	22	1	10.49
			VPA + SB-3CT	23	1	12.0477
			VPA + SB-3CT	24	1	11.35
			VPA + SB-3CT	1	2	16.6333
			VPA + SB-3CT	2	2	21.0413
			VPA + SB-3CT	3	2	19.7327
			VPA + SB-3CT	4	2	17.9097
			VPA + SB-3CT	5	2	15.7053
			VPA + SB-3CT	6	2	16.9963
			VPA + SB-3CT	7	2	15.5157
			VPA + SB-3CT	8	2	16.6507
			VPA + SB-3CT	9	2	15.0873
			VPA + SB-3CT	10	2	12.9407
			VPA + SB-3CT	11	2	13.3493
			VPA + SB-3CT	12	2	15.355
			VPA + SB-3CT	13	2	14.076
			VPA + SB-3CT	14	2	12.9883
			VPA + SB-3CT	15	2	12.6613
			VPA + SB-3CT	16	2	14.516
			VPA + SB-3CT	17	2	12.21
			VPA + SB-3CT	18	2	12.168
			VPA + SB-3CT	19	2	12.3433
			VPA + SB-3CT	20	2	11.171
			VPA + SB-3CT	21	2	11.8967
			VPA + SB-3CT	22	2	10.618
			VPA + SB-3CT	23	2	12.061
			VPA + SB-3CT	24	2	12.1637
			VPA + SB-3CT	1	3	17.0367
			VPA + SB-3CT	2	3	17.3653
			VPA + SB-3CT	3	3	16.8047
			VPA + SB-3CT	4	3	16.402
			VPA + SB-3CT	5	3	19.5367
			VPA + SB-3CT	6	3	15.4517
			VPA + SB-3CT	7	3	15.377
			VPA + SB-3CT	8	3	14.67
			VPA + SB-3CT	9	3	13.3183
			VPA + SB-3CT	10	3	12.457
			VPA + SB-3CT	11	3	14.0557
			VPA + SB-3CT	12	3	14.351
			VPA + SB-3CT	13	3	13.8977
			VPA + SB-3CT	14	3	14.014
			VPA + SB-3CT	15	3	13.4123
			VPA + SB-3CT	16	3	12.8137
			VPA + SB-3CT	17	3	12.4393
			VPA + SB-3CT	18	3	10.5977
			VPA + SB-3CT	19	3	11.24
			VPA + SB-3CT	20	3	13.3697
			VPA + SB-3CT	21	3	11.571
			VPA + SB-3CT	22	3	10.0337
			VPA + SB-3CT	23	3	11.956
			VPA + SB-3CT	24	3	10.8777
			VPA + SB-3CT	1	4	17.133
			VPA + SB-3CT	2	4	16.9643
			VPA + SB-3CT	3	4	14.736
			VPA + SB-3CT	4	4	15.6323
			VPA + SB-3CT	5	4	15.8193
			VPA + SB-3CT	6	4	16.4763
			VPA + SB-3CT	7	4	13.77
			VPA + SB-3CT	8	4	13.4587
			VPA + SB-3CT	9	4	12.909
			VPA + SB-3CT	10	4	12.7983
			VPA + SB-3CT	11	4	13.2627
			VPA + SB-3CT	12	4	13.122
			VPA + SB-3CT	13	4	11.9367
			VPA + SB-3CT	14	4	12.7463
			VPA + SB-3CT	15	4	12.728
			VPA + SB-3CT	16	4	14.2093
			VPA + SB-3CT	17	4	14.507
			VPA + SB-3CT	18	4	12.08
			VPA + SB-3CT	19	4	11.5117
			VPA + SB-3CT	20	4	11.6933
			VPA + SB-3CT	21	4	10.584
			VPA + SB-3CT	22	4	11.193
			VPA + SB-3CT	23	4	12.8313
			VPA + SB-3CT	24	4	11.592
			VPA + SB-3CT	1	5	17.1277
			VPA + SB-3CT	2	5	16.2803
			VPA + SB-3CT	3	5	16.258
			VPA + SB-3CT	4	5	13.438
			VPA + SB-3CT	5	5	13.7923
			VPA + SB-3CT	6	5	10.7647
			VPA + SB-3CT	7	5	12.2857
			VPA + SB-3CT	8	5	11.3457
			VPA + SB-3CT	9	5	11.1563
			VPA + SB-3CT	10	5	11.3527
			VPA + SB-3CT	11	5	10.6193
			VPA + SB-3CT	12	5	12.4713
			VPA + SB-3CT	13	5	11.7177
			VPA + SB-3CT	14	5	12.008
			VPA + SB-3CT	15	5	14.8213
			VPA + SB-3CT	16	5	12.7523
			VPA + SB-3CT	17	5	13.0573
			VPA + SB-3CT	18	5	11.272
			VPA + SB-3CT	19	5	11.0337
			VPA + SB-3CT	20	5	11.5657
			VPA + SB-3CT	21	5	10.4643
			VPA + SB-3CT	22	5	10.7057
			VPA + SB-3CT	23	5	10.95
			VPA + SB-3CT	24	5	11.5567
			VPA + SB-3CT	1	6	19.813
			VPA + SB-3CT	2	6	18.26
			VPA + SB-3CT	3	6	17.819
			VPA + SB-3CT	4	6	16.0377
			VPA + SB-3CT	5	6	19.0727
			VPA + SB-3CT	6	6	17.813
			VPA + SB-3CT	7	6	14.2517
			VPA + SB-3CT	8	6	17.3053
			VPA + SB-3CT	9	6	14.2257
			VPA + SB-3CT	10	6	14.8803
			VPA + SB-3CT	11	6	13.3703
			VPA + SB-3CT	12	6	15.7103
			VPA + SB-3CT	13	6	14.0887
			VPA + SB-3CT	14	6	13.458
			VPA + SB-3CT	15	6	13.7583
			VPA + SB-3CT	16	6	12.772
			VPA + SB-3CT	17	6	12.8987
			VPA + SB-3CT	18	6	11.7233
			VPA + SB-3CT	19	6	11.5717
			VPA + SB-3CT	20	6	11.6263
			VPA + SB-3CT	21	6	11.9447
			VPA + SB-3CT	22	6	11.0807
			VPA + SB-3CT	23	6	13.4233
			VPA + SB-3CT	24	6	9.257
			Control	1	1	16.6187
			Control	2	1	15.7096
			Control	3	1	14.6538
			Control	4	1	15.2054
			Control	5	1	14.8267
			Control	6	1	13.365
			Control	7	1	14.3967
			Control	8	1	14.24
			Control	9	1	13.4946
			Control	10	1	14.7721
			Control	11	1	12.8271
			Control	12	1	14.0892
			Control	13	1	13.1875
			Control	14	1	13.0142
			Control	15	1	14.0017
			Control	16	1	13.7329
			Control	17	1	14.0354
			Control	18	1	14.28
			Control	19	1	14.2312
			Control	20	1	13.665
			Control	21	1	12.9967
			Control	22	1	13.9158
			Control	23	1	13.3971
			Control	24	1	12.69
			Control	1	2	11.5471
			Control	2	2	12.0371
			Control	3	2	11.7796
			Control	4	2	11.7842
			Control	5	2	12.8142
			Control	6	2	12.1258
			Control	7	2	11.3508
			Control	8	2	12.1842
			Control	9	2	12.6562
			Control	10	2	11.4983
			Control	11	2	11.6913
			Control	12	2	11.0492
			Control	13	2	11.8413
			Control	14	2	11.6167
			Control	15	2	11.3333
			Control	16	2	10.4883
			Control	17	2	11.5817
			Control	18	2	10.8667
			Control	19	2	10.9079
			Control	20	2	10.665
			Control	21	2	10.6533
			Control	22	2	10.0425
			Control	23	2	10.21
			Control	24	2	10.04
			Control	1	3	12.0358
			Control	2	3	10.3542
			Control	3	3	9.32917
			Control	4	3	10.9408
			Control	5	3	9.63583
			Control	6	3	10.3846
			Control	7	3	10.4871
			Control	8	3	10.7229
			Control	9	3	10.0933
			Control	10	3	10.8338
			Control	11	3	10.6225
			Control	12	3	9.60583
			Control	13	3	11.7846
			Control	14	3	10.1137
			Control	15	3	11.1821
			Control	16	3	11.6
			Control	17	3	9.14875
			Control	18	3	10.5488
			Control	19	3	10.4721
			Control	20	3	10.6363
			Control	21	3	11.0479
			Control	22	3	9.89125
			Control	23	3	12.4325
			Control	24	3	11.4062
			Control	1	4	10.2696
			Control	2	4	8.20625
			Control	3	4	9.45083
			Control	4	4	9.05375
			Control	5	4	9.90042
			Control	6	4	9.78458
			Control	7	4	8.26375
			Control	8	4	9.65042
			Control	9	4	9.695
			Control	10	4	8.81625
			Control	11	4	8.71333
			Control	12	4	9.22708
			Control	13	4	9.69667
			Control	14	4	8.2525
			Control	15	4	8.89875
			Control	16	4	9.24208
			Control	17	4	9.11826
			Control	18	4	8.66375
			Control	19	4	9.72833
			Control	20	4	9.53
			Control	21	4	8.72667
			Control	22	4	7.75083
			Control	23	4	10.6571
			Control	24	4	8.28833
			Control	1	5	9.9225
			Control	2	5	10.6346
			Control	3	5	10.8829
			Control	4	5	9.40333
			Control	5	5	10.0196
			Control	6	5	9.36167
			Control	7	5	9.73583
			Control	8	5	9.07
			Control	9	5	9.82542
			Control	10	5	8.45792
			Control	11	5	8.82958
			Control	12	5	8.10125
			Control	13	5	8.99792
			Control	14	5	9.96
			Control	15	5	9.27458
			Control	16	5	9.24542
			Control	17	5	9.37958
			Control	18	5	8.73833
			Control	19	5	8.30708
			Control	20	5	8.19833
			Control	21	5	7.73875
			Control	22	5	7.84083
			Control	23	5	8.90542
			Control	24	5	7.36542
			Control	1	6	10.0546
			Control	2	6	9.03292
			Control	3	6	9.35917
			Control	4	6	9.13375
			Control	5	6	10.0592
			Control	6	6	9.60667
			Control	7	6	9.585
			Control	8	6	9.24917
			Control	9	6	9.87542
			Control	10	6	10.5887
			Control	11	6	9.4225
			Control	12	6	10.6292
			Control	13	6	10.1304
			Control	14	6	9.87833
			Control	15	6	10.3621
			Control	16	6	11.0071
			Control	17	6	10.4817
			Control	18	6	8.62042
			Control	19	6	10.1288
			Control	20	6	9.34833
			Control	21	6	8.77292
			Control	22	6	10.0896
			Control	23	6	10.6158
			Control	24	6	10.2142
