# Supplementary material for: Role of matrix metalloproteinase-9 in neurodevelopmental deficits and experience-dependent plasticity in Xenopus laevis
Source: eLife. 2021 Jul 20;10:e62147. doi: 10.7554/eLife.62147 (PMC8315794; doi:10.7554/eLife.62147)
Supplement: Figure 5—figure supplement 1—source data 1. [file elife-62147-fig5-figsupp1-data1.xlsx]

## Sheet: Figure 5- Figure supplement 1
Figure 5- Figure supplement 1B
Region of tectum	Group	Mean F-WFA intensity
Cell body	Control	5.95875
Cell body	Control	5.10356
Cell body	Control	3.36044
Cell body	Control	1.79525
Cell body	Control	9.33369
Cell body	Control	11.3051
Cell body	Control	9.6465
Cell body	Control	17.4994
Cell body	Control	13.1277
Cell body	Control	13.2252
Cell body	Control	27.3301
Cell body	VPA	4.17569
Cell body	VPA	2.1785
Cell body	VPA	3.85269
Cell body	VPA	2.78337
Cell body	VPA	7.71675
Cell body	VPA	2.61917
Cell body	VPA	7.98842
Cell body	VPA	13.3809
Cell body	VPA	15.165
Cell body	VPA	12.8964
Cell body	VPA	14.9591
Neuropil	Control	9.62381
Neuropil	Control	8.32863
Neuropil	Control	5.75725
Neuropil	Control	6.15388
Neuropil	Control	18.3029
Neuropil	Control	13.0776
Neuropil	Control	15.7658
Neuropil	Control	33.1885
Neuropil	Control	23.5027
Neuropil	Control	22.1489
Neuropil	Control	44.882
Neuropil	VPA	6.25181
Neuropil	VPA	4.06258
Neuropil	VPA	6.00381
Neuropil	VPA	5.95988
Neuropil	VPA	16.3797
Neuropil	VPA	9.30833
Neuropil	VPA	14.1082
Neuropil	VPA	21.135
Neuropil	VPA	30.0671
Neuropil	VPA	26.0486
Neuropil	VPA	32.0893
