# Supplementary material for: Role of matrix metalloproteinase-9 in neurodevelopmental deficits and experience-dependent plasticity in Xenopus laevis
Source: eLife. 2021 Jul 20;10:e62147. doi: 10.7554/eLife.62147 (PMC8315794; doi:10.7554/eLife.62147)
Supplement: Figure 5—source data 1. [file elife-62147-fig5-data1.xlsx]

## Sheet: Figure 5
Figure 5. B			Figure 5. C				Figure 5. D
Group	Relative MMP9 levels		Group	Growth Dark (%)	Growth Light (%)		Group	Change in Growth Rate
L/D	1.68		Control	99.1243	132.332		Control	133.501
L/D	1.26		Control	89.3443	139.144		Control	155.739
L/D	1.14		Control	75.1381	113.603		Control	151.192
L/D	1.48		Control	86.7521	165.517		Control	190.793
L/D	1.16		Control	80.4772	141.24		Control	175.503
L/N	1.23		Control	101.601	138.441		Control	136.259
L/N	1.19		Control	133.236	110.503		Control	82.9379
L/N	1.69		Control	104.656	123.941		Control	118.426
L/N	1.14		Control	105.882	90.1961		Control	85.1852
L/N	1.5		SB-3CT	118.491	91.7197		SB-3CT	77.4068
D/N	0.73		SB-3CT	137.209	147.458		SB-3CT	107.469
D/N	0.94		SB-3CT	86.5979	93.254		SB-3CT	107.686
D/N	1.48		SB-3CT	100.926	82.3394		SB-3CT	81.584
D/N	0.77		SB-3CT	90.39	62.2496		SB-3CT	68.8678
D/N	1.28		SB-3CT	104.83	110.298		SB-3CT	105.217
			SB-3CT	79.669	94.362		SB-3CT	118.443
			SB-3CT	129.286	83.4254		SB-3CT	64.5279
			SB-3CT	118.382	106.832		SB-3CT	90.2434
