# Supplementary figures and images for: Role of matrix metalloproteinase-9 in neurodevelopmental deficits and experience-dependent plasticity in Xenopus laevis
Source: eLife journal article supplement (doi:10.7554/elife.62147), 2021-07-20

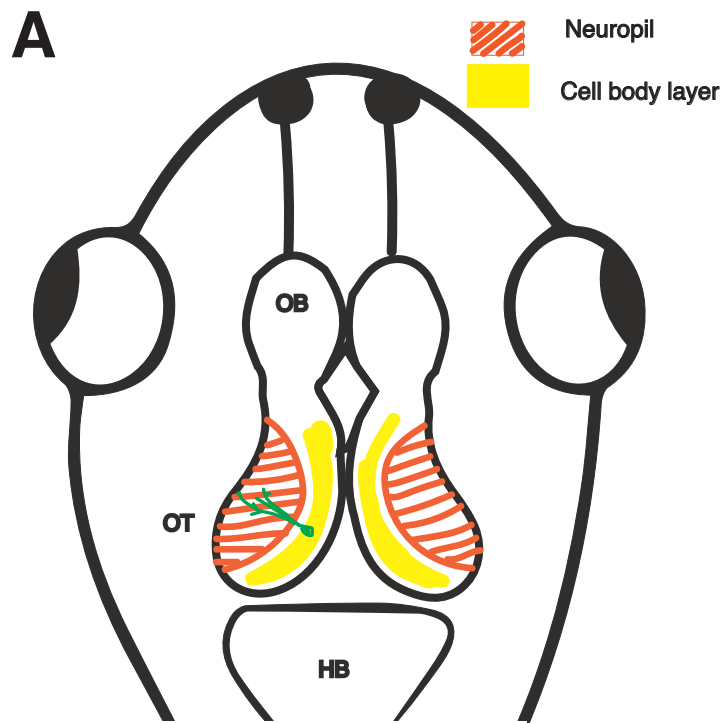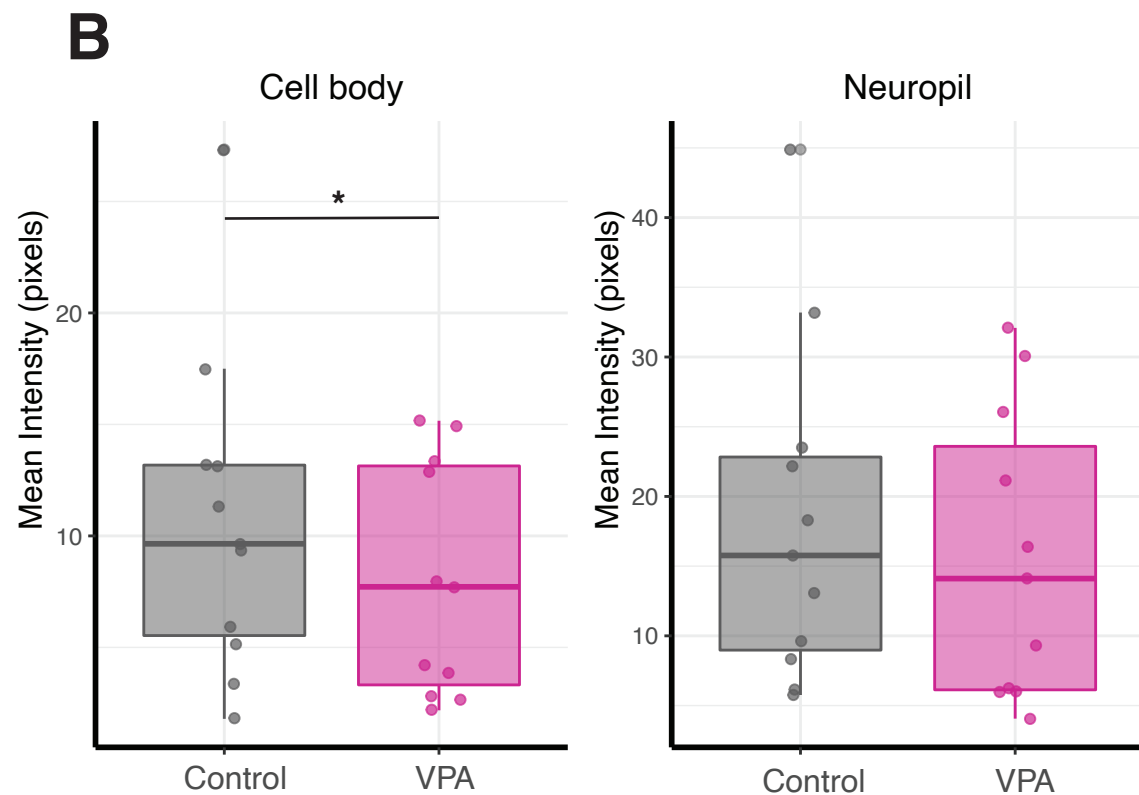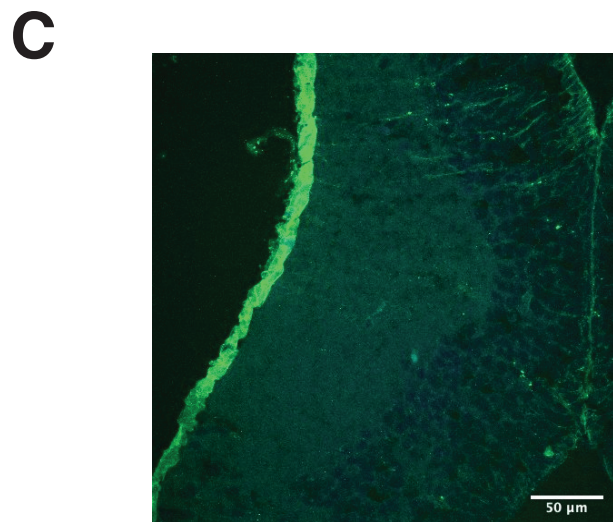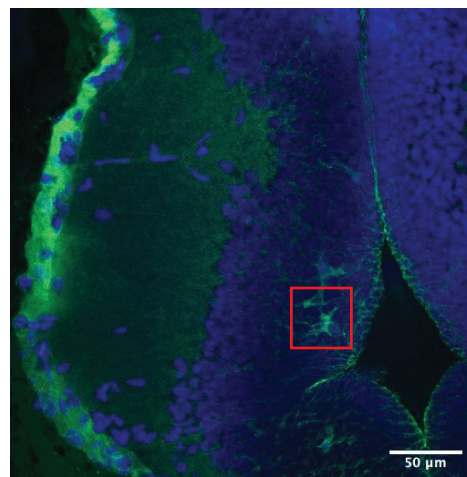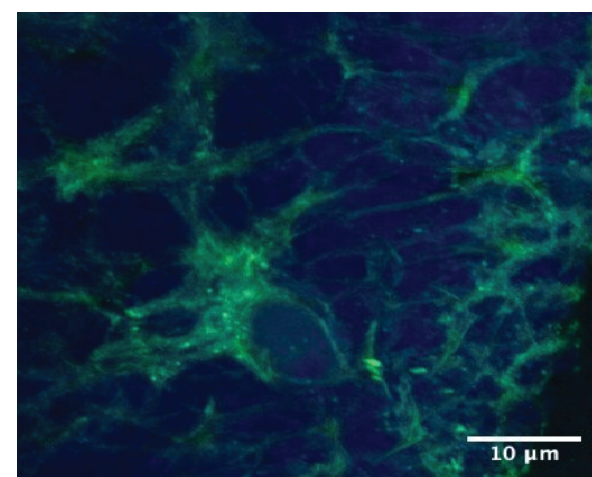

Supplement: supp [file elife-62147-supp-v1.zip]

**A**

Synapse density (#puncta/micron)

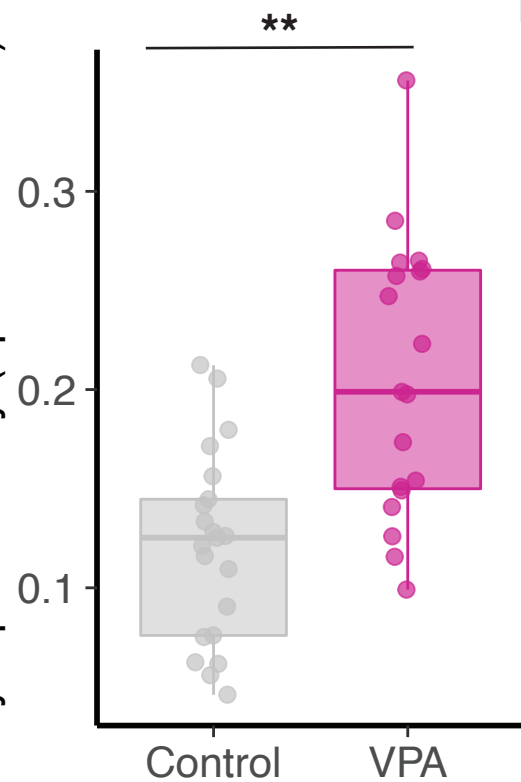**B**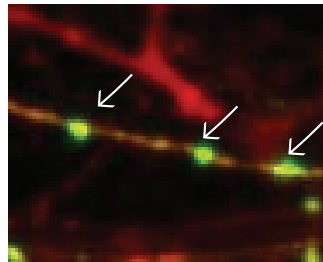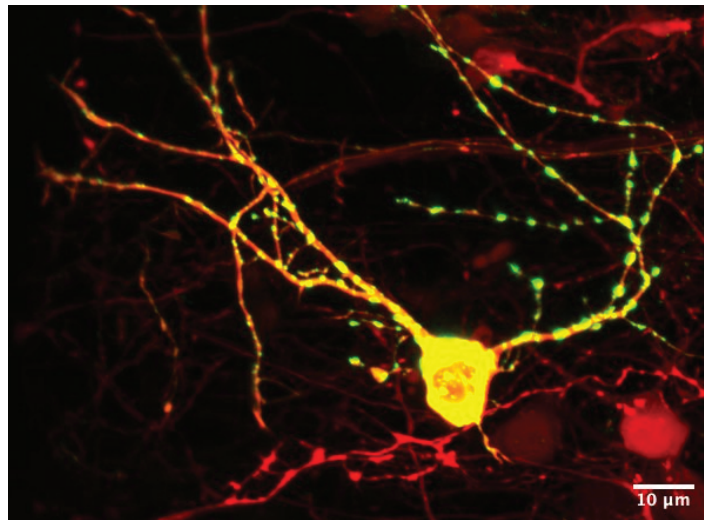**C**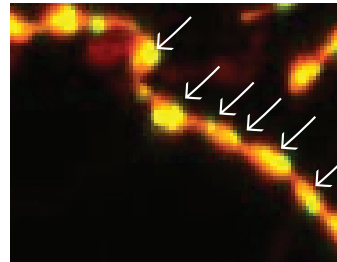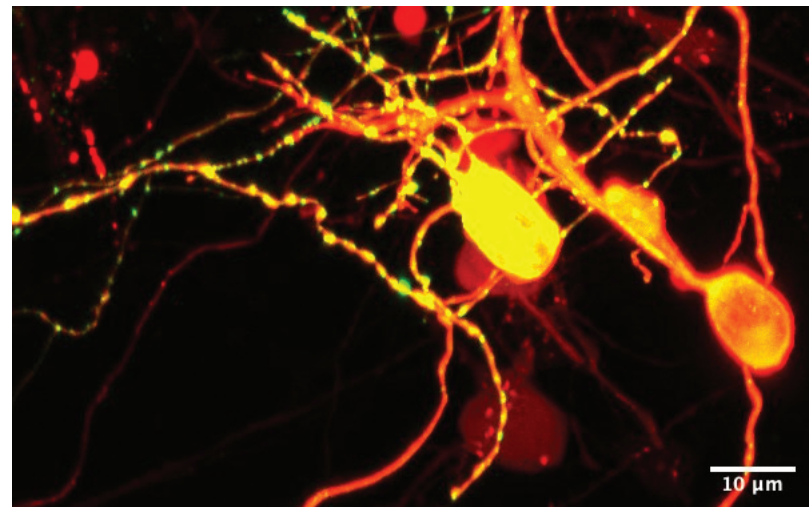

Supplement: supp [file elife-62147-supp-v1.zip]
